# Supplementary material for: Doping regulates pyro-photo-electric catalysis to achieve efficient water splitting in Ba1−xSrxTiO3 through solar energy and thermal resources
Source: Royal Society of Chemistry journal article supplement (doi:10.1039/d2nj02254k), 2022-01-01
Supplement: d2nj02254k1.pdf [file d2nj02254k1.pdf]

### Supporting Information

Fig. S1 (a) SEM image of TiO<sub>2</sub> nanorods arrays and (b) TEM block image

Fig. S2 XPS spectra of Ba<sub>0.8</sub>Sr<sub>0.2</sub>TiO<sub>3</sub>, Ba<sub>0.7</sub>Sr<sub>0.3</sub>TiO<sub>3</sub> and Ba<sub>0.3</sub>Sr<sub>0.7</sub>TiO<sub>3</sub>

Fig. S3 The applied bias photon-to-current efficiency (ABPE) of (a) Ba<sub>0.8</sub>Sr<sub>0.2</sub>TiO<sub>3</sub> and (b) Ba<sub>0.3</sub>Sr<sub>0.7</sub>TiO<sub>3</sub> photoanode

Fig. S4 UV-Vis absorption spectra of different doping concentrations corresponding to tauc plots of (a) Ba<sub>0.8</sub>Sr<sub>0.2</sub>TiO<sub>3</sub>; (b) Ba<sub>0.7</sub>Sr<sub>0.3</sub>TiO<sub>3</sub>; (c) Ba<sub>0.3</sub>Sr<sub>0.7</sub>TiO<sub>3</sub>

Fig. S5 The bulk charge separation efficiency of three different doping concentrations photoanodes

Fig. S6 Mott-Schottky plots of (a) Ba<sub>0.8</sub>Sr<sub>0.2</sub>TiO<sub>3</sub> and (b) Ba<sub>0.3</sub>Sr<sub>0.7</sub>TiO<sub>3</sub> photoanode

Tab. S1 Flat band potential ( $V_{fb}$ ) and donor density ( $N_A$ ) of Ba<sub>0.8</sub>Sr<sub>0.2</sub>TiO<sub>3</sub> electrodes deduced from Mott-Schottky

Tab. S2 Flat band potential ( $V_{fb}$ ) and donor density ( $N_A$ ) of Ba<sub>0.7</sub>Sr<sub>0.3</sub>TiO<sub>3</sub> electrodes deduced from Mott-Schottky

Tab. S3 Flat band potential ( $V_{fb}$ ) and donor density ( $N_A$ ) of Ba<sub>0.3</sub>Sr<sub>0.7</sub>TiO<sub>3</sub> electrodes deduced from Mott-Schottky

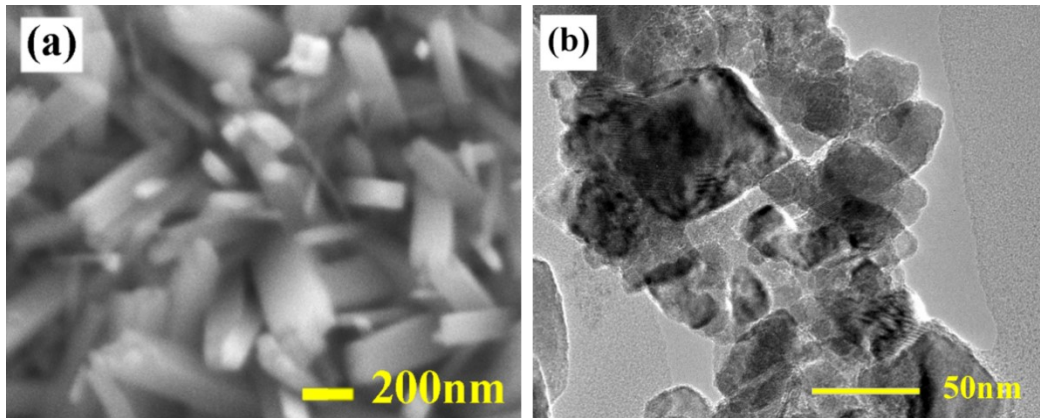

Fig. S1 (a) SEM image of TiO<sub>2</sub> nanorods arrays and (b) TEM block image

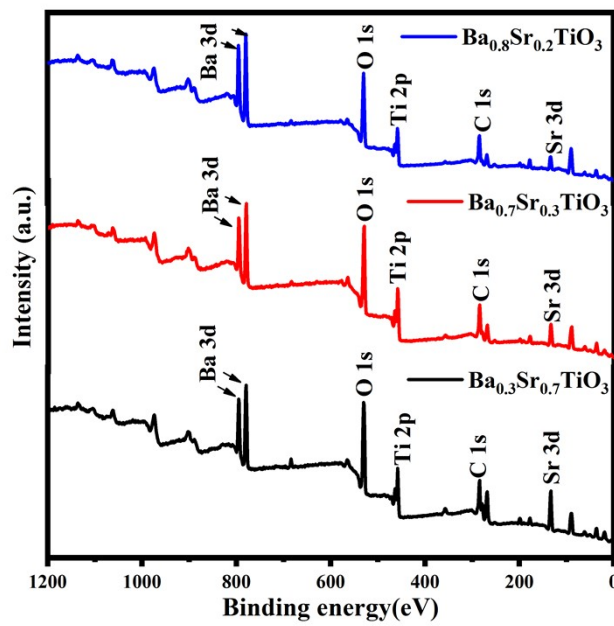

Fig. S2 XPS spectra of Ba<sub>0.8</sub>Sr<sub>0.2</sub>TiO<sub>3</sub>, Ba<sub>0.7</sub>Sr<sub>0.3</sub>TiO<sub>3</sub> and Ba<sub>0.3</sub>Sr<sub>0.7</sub>TiO<sub>3</sub>

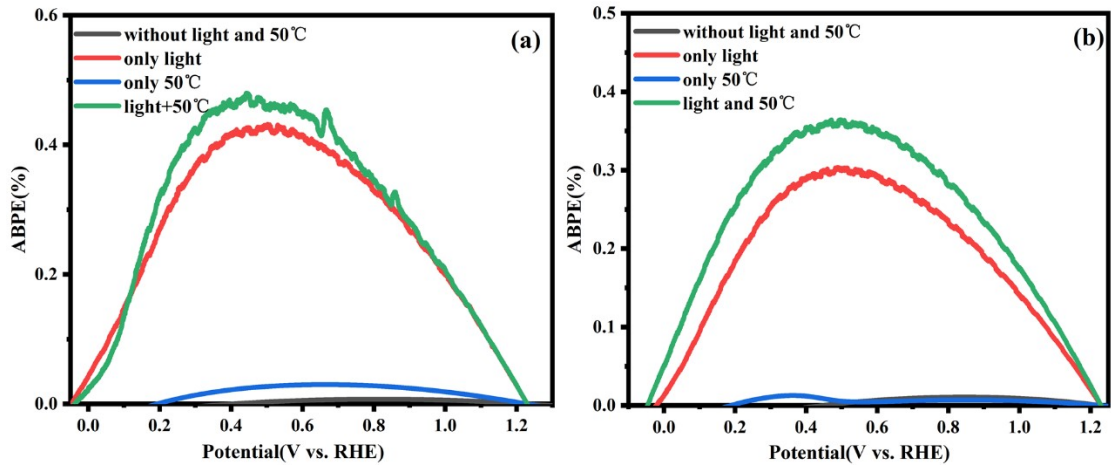

Fig. S3 The applied bias photon-to-current efficiency (ABPE) of (a)  $\text{Ba}_{0.8}\text{Sr}_{0.2}\text{TiO}_3$  and (b)  $\text{Ba}_{0.3}\text{Sr}_{0.7}\text{TiO}_3$  photoanode

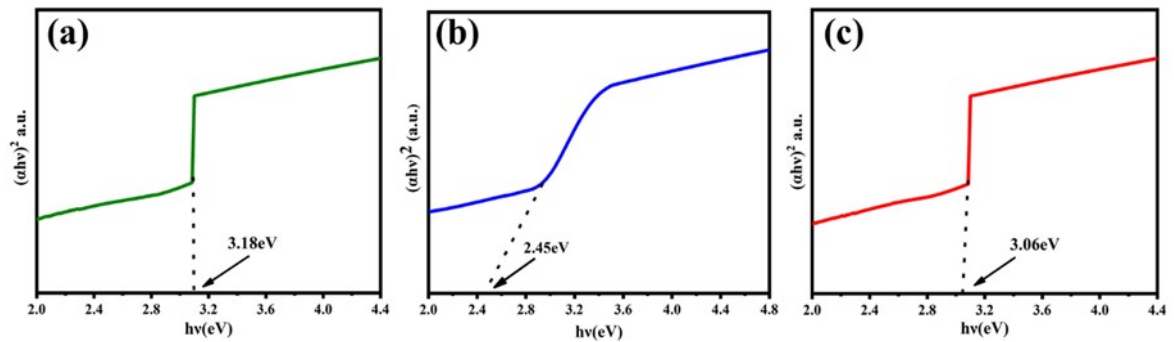

Fig. S4 UV-Vis absorption spectra of different doping concentrations corresponding to tauc plots of (a)  $\text{Ba}_{0.8}\text{Sr}_{0.2}\text{TiO}_3$ ; (b)  $\text{Ba}_{0.7}\text{Sr}_{0.3}\text{TiO}_3$ ; (c)  $\text{Ba}_{0.3}\text{Sr}_{0.7}\text{TiO}_3$

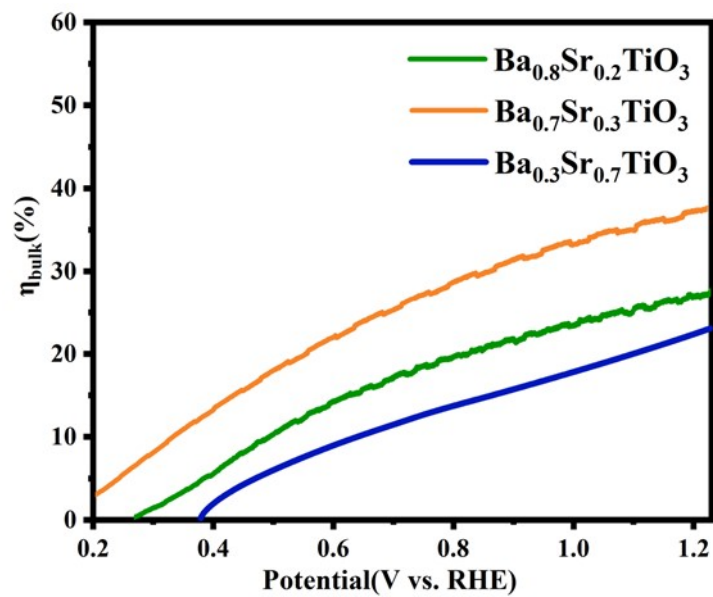

Fig. S5 The bulk charge separation efficiency of three different doping concentrations photoanodes

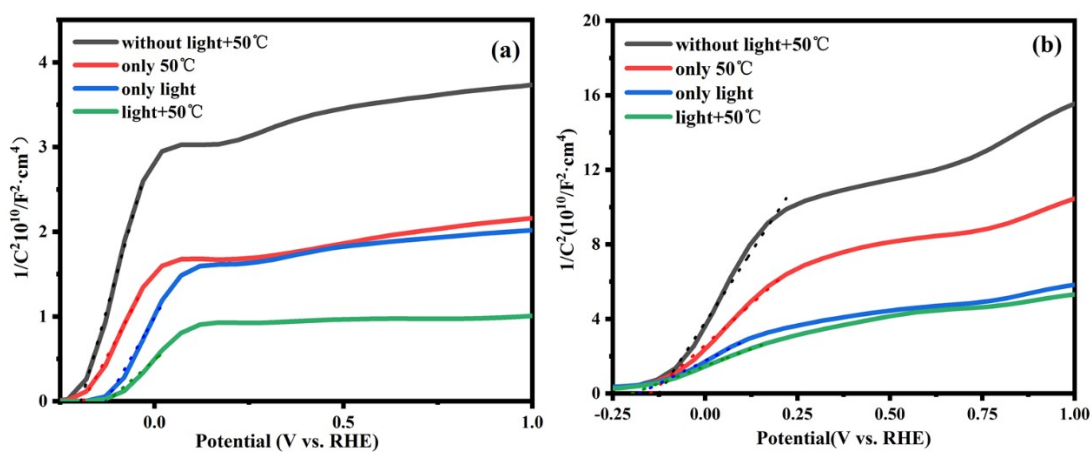

Fig. S6 Mott-Schottky plots of (a)  $\text{Ba}_{0.8}\text{Sr}_{0.2}\text{TiO}_3$  and (b)  $\text{Ba}_{0.3}\text{Sr}_{0.7}\text{TiO}_3$  photoanode

Tab. S1 Flat band potential ( $V_{fb}$ ) and donor density ( $N_A$ ) of  $Ba_{0.8}Sr_{0.2}TiO_3$  electrodes deduced from Mott-Schottky

| Conditions     | $V_{fb}$ (V vs. RHE) | $N_A$ ( $\times 10^{20} \text{ cm}^{-3}$ ) |
|----------------|----------------------|--------------------------------------------|
| Dark           | 3.094                | 0.11                                       |
| Only light     | 1.577                | 0.229                                      |
| Only 50°C      | 0.989                | 0.211                                      |
| Light and 50°C | 0.487                | 0.452                                      |

Tab. S2 Flat band potential ( $V_{fb}$ ) and donor density ( $N_A$ ) of  $Ba_{0.7}Sr_{0.3}TiO_3$  electrodes deduced from Mott-Schottky

| Conditions     | $V_{fb}$ (V vs. RHE) | $N_A$ ( $\times 10^{20} \text{ cm}^{-3}$ ) |
|----------------|----------------------|--------------------------------------------|
| Dark           | 0.834                | 0.18                                       |
| Only light     | 0.245                | 3.46                                       |
| Only 50°C      | 0.587                | 0.509                                      |
| Light and 50°C | 0.102                | 7.62                                       |

Tab. S3 Flat band potential ( $V_{fb}$ ) and donor density ( $N_A$ ) of  $Ba_{0.3}Sr_{0.7}TiO_3$  electrodes deduced from Mott-Schottky

| Conditions     | $V_{fb}$ (V vs. RHE) | $N_A$ ( $\times 10^{20} \text{ cm}^{-3}$ ) |
|----------------|----------------------|--------------------------------------------|
| Dark           | 3.808                | 0.058                                      |
| Only light     | 2.610                | 0.179                                      |
| Only 50°C      | 1.759                | 0.100                                      |
| Light and 50°C | 1.473                | 0.237                                      |
